# Supplementary material
Source: Springer Nature journal article supplement (https://www.springermedizin.de/resource/supplementary/13058_2009_2439_MOESM5_ESM.pdf/9701420)

(a)

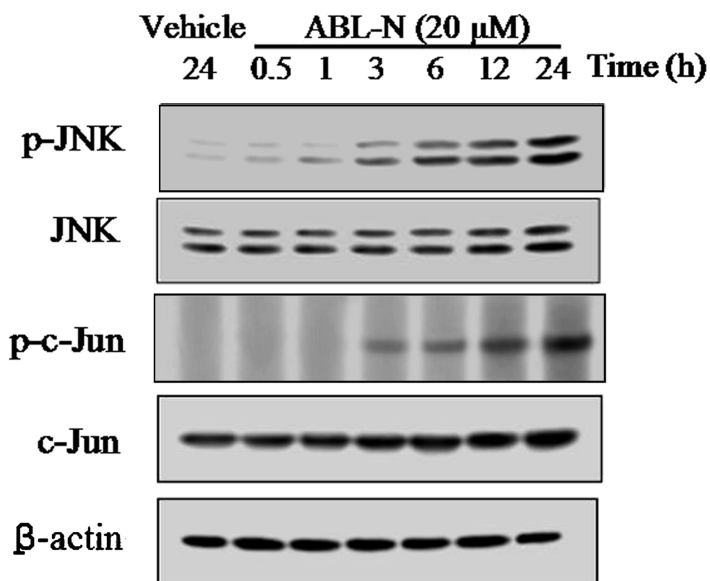

(b)

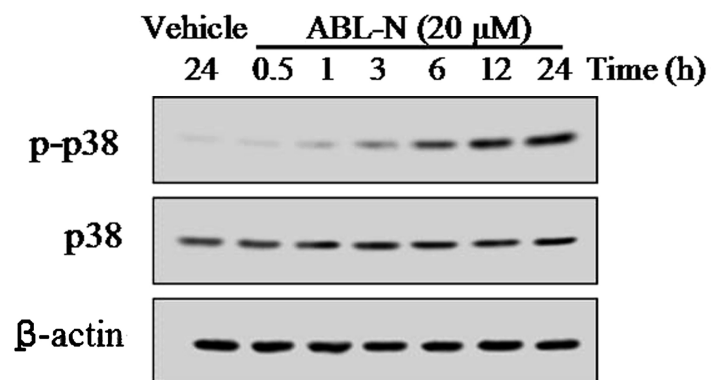

(c)

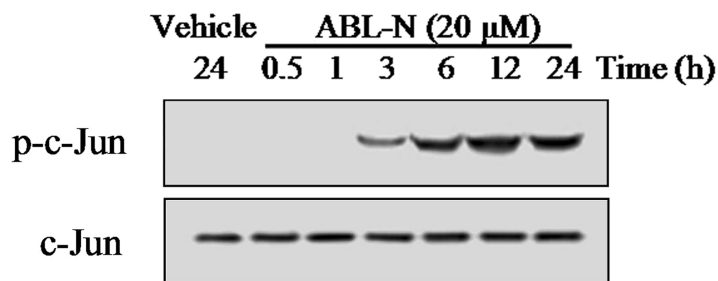

(d)

| ABL-N (20 $\mu$ M) | - | + | - | + |
|--------------------|---|---|---|---|
| GST-JNK1           | + | + | - | - |
| Cell lysates       | - | - | + | + |

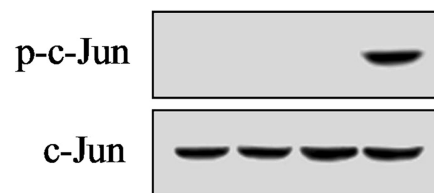

(e)

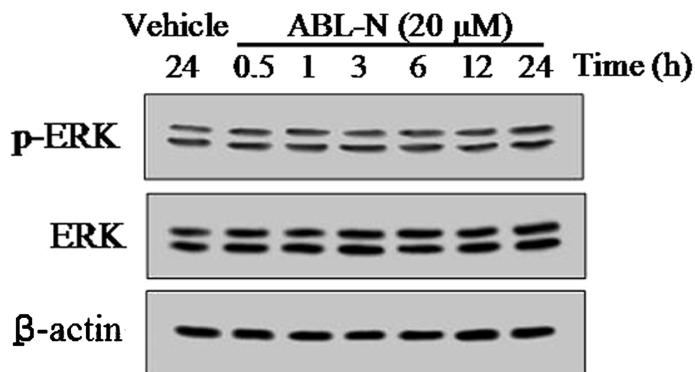

Supplement: MOESM5 [file 9701420]
